# Supplementary material for: Kidney Function Trajectories and Right Heart Failure Following LVAD Implantation
Source: PubMed Central journal article supplement — J Am Heart Assoc. 2024 Feb 29;13(5):e031305. doi: 10.1161/JAHA.123.031305 (PMC10944080; doi:10.1161/jaha.123.031305), 2024-02-29
Supplement: JAH3-13-e031305-s001.pdf [file JAH3-13-e031305-s001.pdf]

# **SUPPLEMENTAL MATERIAL**

**Table S1. Reasons for lack of data at 3-months post-LVAD implantation, resulting in exclusion of 3226 individuals from the investigation of right heart failure at 3-months.**

| <b>Reason</b>                                                     | <b>Number (% of the excluded)</b> |
|-------------------------------------------------------------------|-----------------------------------|
| Censoring event prior to 3-month RHF ascertainment window*        |                                   |
| Death                                                             | 290 (9.0%)                        |
| Cardiac transplantation                                           | 176 (5.5%)                        |
| Device explantation or exchange                                   | 152 (4.7%)                        |
| Last available follow-up                                          | 293 (9.1%)                        |
| No follow-up recorded during the 3-month RHF ascertainment window | 2315 (71.7%)                      |

\*3-month RHF ascertainment window was from 2.5 to 3.5 months following LVAD implantation.

**Table S2. Baseline characteristics comparing persons with and without data available from the 3-month ascertainment window who were not censored at that time.**

| Characteristic (at baseline)              | Follow-up at 3 months |               | SMD*  |
|-------------------------------------------|-----------------------|---------------|-------|
|                                           | Available             | Not available |       |
| Number                                    | 4850                  | 2315          |       |
| Age, y                                    | 56.6 (13.1)           | 56.0 (12.7)   | 0.049 |
| Female                                    | 1002 (20.7%)          | 496 (21.4%)   | 0.019 |
| Race                                      |                       |               | 0.079 |
| Asian                                     | 72 (1.5%)             | 50 (2.2%)     |       |
| Black                                     | 1233 (25.4%)          | 623 (26.9%)   |       |
| Other                                     | 255 (5.3%)            | 126 (5.4%)    |       |
| Unknown                                   | 162 (3.3%)            | 58 (2.5%)     |       |
| White                                     | 3128 (64.5%)          | 1458 (63.0%)  |       |
| Hispanic ethnicity                        | 325 (6.7%)            | 151 (6.5%)    | 0.007 |
| Device strategy                           |                       |               | 0.011 |
| Bridge to candidacy                       | 1199 (24.7%)          | 572 (24.7%)   |       |
| Bridge to transplant                      | 1270 (26.2%)          | 596 (25.7%)   |       |
| Destination                               | 2361 (48.7%)          | 1137 (49.1%)  |       |
| Other                                     | 20 (0.4%)             | 10 (0.4%)     |       |
| Intermacs profile                         |                       |               | 0.048 |
| Critical cardiogenic shock (1)            | 689 (14.2%)           | 324 (14.0%)   |       |
| Progressive decline (2)                   | 1695 (34.9%)          | 764 (33.0%)   |       |
| Stable, inotrope dependent (3)            | 1808 (37.3%)          | 911 (39.4%)   |       |
| Resting symptoms or lesser severity (4-7) | 658 (13.6%)           | 316 (13.7%)   |       |
| Centrifugal LVAD                          | 1548 (31.9%)          | 778 (33.6%)   | 0.036 |
| BMI (kg/m <sup>2</sup> )                  | 28.5 (7.0)            | 28.51 (7.36)  | 0.003 |
| Diabetes, "severe" by INTERMACS           | 211 (4.4%)            | 96 (4.1%)     | 0.01  |
| CKD, INTERMACS classification             | 343 (7.1%)            | 146 (6.3%)    | 0.031 |
| Primary cardiac disease etiology          |                       |               | 0.059 |
| Idiopathic                                | 1591 (33.1%)          | 798 (34.7%)   |       |
| Infectious cardiomyopathy                 | 141 (2.9%)            | 70 (3.0%)     |       |
| Ischemic cardiomyopathy                   | 2082 (43.3%)          | 933 (40.6%)   |       |
| Other specified cause                     | 903 (18.8%)           | 459 (20.0%)   |       |
| Toxic cardiomyopathy                      | 89 (1.9%)             | 38 (1.7%)     |       |
| LV ejection fraction <20%                 | 3245 (66.9%)          | 1587 (68.6%)  | 0.035 |
| Severe RV dysfunction                     | 539 (11.1%)           | 276 (11.9%)   | 0.025 |
| Inotrope use                              | 4061 (83.7%)          | 1937 (83.7%)  | 0.002 |
| Systolic blood pressure (mmHg)            | 106.3 (16.0)          | 106.4 (16.1)  | 0.007 |
| Diastolic blood pressure (mmHg)           | 65.9 (11.4)           | 66.0 (11.2)   | 0.003 |
| Prior tricuspid valve repair/replacement  | 29 (0.6%)             | 15 (0.6%)     | 0.006 |
| Temporary mechanical circulatory support  | 1257 (30.0%)          | 589 (29.5%)   | 0.011 |
| IABP                                      | 852 (17.6%)           | 382 (16.5%)   | 0.028 |
| ECMO                                      | 111 (2.3%)            | 63 (2.7%)     | 0.028 |

|                                   |             |             |       |
|-----------------------------------|-------------|-------------|-------|
| Mechanical Ventilation            | 214 (4.4%)  | 117 (5.1%)  | 0.03  |
| Hemoglobin (g/dl)                 | 11.3 (2.2)  | 11.3 (2.2)  | 0.011 |
| WBC ( $10^3/\mu\text{l}$ )        | 8.5 (3.8)   | 8.6 (4.2)   | 0.023 |
| Platelets ( $10^3/\mu\text{l}$ )  | 200 (79)    | 200 (81)    | 0.004 |
| Total bilirubin (mg/dl)           | 1.3 (1.6)   | 1.3 (1.4)   | 0.015 |
| BUN (mg/dl)                       | 28.3 (17.0) | 28.1 (16.7) | 0.012 |
| Serum creatinine (mg/dl)          | 1.4 (0.6)   | 1.4 (0.6)   | 0.02  |
| eGFR (ml/min/1.73m <sup>2</sup> ) | 66.7 (25.7) | 66.8 (25.2) | 0.002 |
| Albumin (g/dl)                    | 3.4 (0.6)   | 3.5 (0.6)   | 0.039 |

Means (standard deviations) are given for continuous variables. Numbers and percentages are given for categorical variables.

SMD, standardized mean difference; CKD, chronic kidney disease; LV, left ventricular; RV, right ventricular; IABP, intraaortic balloon pump; ECMO, extracorporeal membrane oxygenation; WBC, white blood cells; BUN, blood urea nitrogen; eGFR, estimated glomerular filtration rate.

\*Standardized mean difference (SMD) calculations are described in the reference.<sup>29</sup>

**Figure S1. Kaplan Meier estimates and 95% confidence intervals comparing survival among persons with and without data available from the 3-month RHF ascertainment window.**

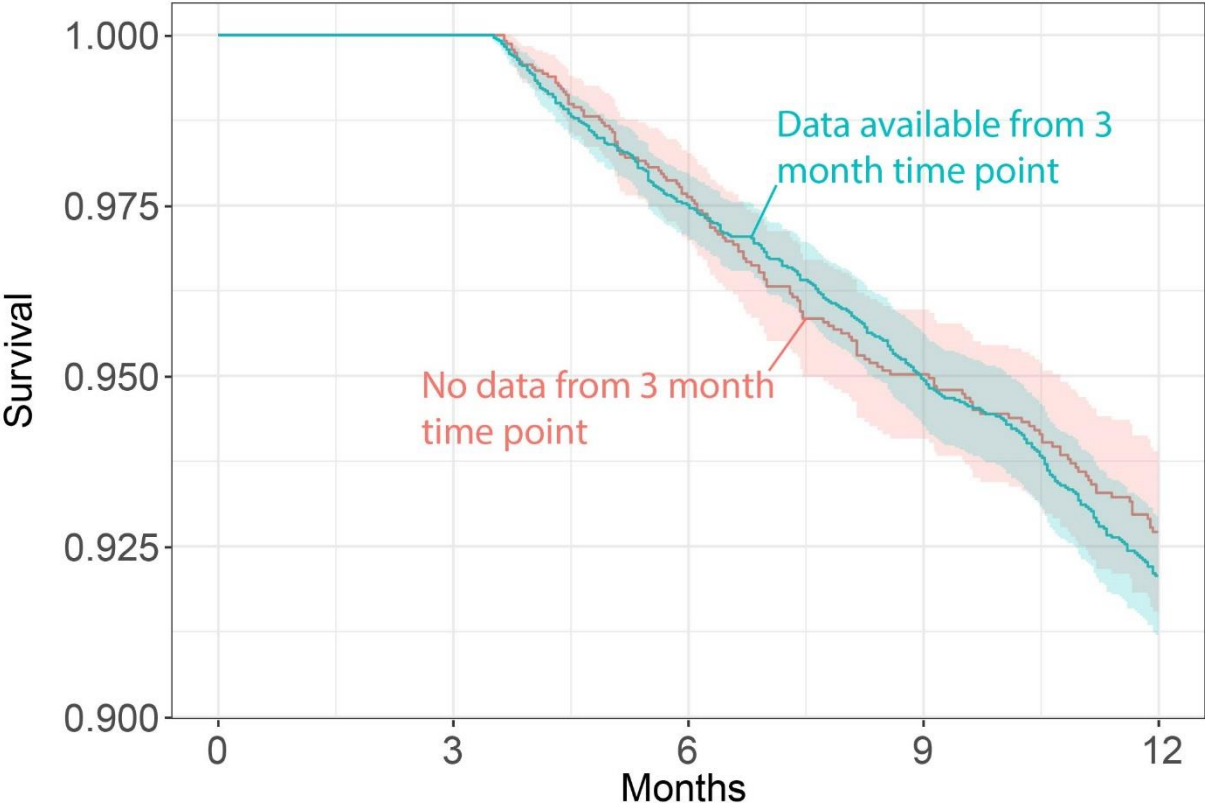

Note:  $p = 0.2$  by log rank test
